# Supplementary material for: Exploration of using thermally responsive polyionic liquid hydrogels as draw agents in forward osmosis
Source: Royal Society of Chemistry journal article supplement (doi:10.1039/c5ra19018e), 2015-01-01
Supplement: c5ra19018e1.pdf [file c5ra19018e1.pdf]

1  
2  
3  
4  
5  
6  
7  
8  
9  
10  
11  
12  
13  
14  
15  
16  
17  
18  
19

## Supporting information

### **Exploration of using thermally responsive polyionic liquid hydrogels as draw agents in forward osmosis**

*Yufeng Cai<sup>a,b</sup>, Rong Wang<sup>b,c</sup>, William B. Krantz<sup>c,d</sup>, Anthony G. Fane<sup>b,c</sup>, and Xiao Hu<sup>a,b,c,\*</sup>*

<sup>a</sup>School of Materials Science and Engineering, Nanyang Technological University, 50 Nanyang Avenue, Singapore

<sup>b</sup>Singapore Membrane Technology Centre, Nanyang Environmental & Water Research Institute, 1 cleantech loop, Singapore

<sup>c</sup>School of Civil & Environmental Engineering, Nanyang Technological University, 50 Nanyang Avenue, Singapore

<sup>d</sup>Department of Chemical and Biological Engineering, University of Colorado, USA

20 **Influence of hydrogel contact condition and FO membrane on swelling**  
 21 **performance**

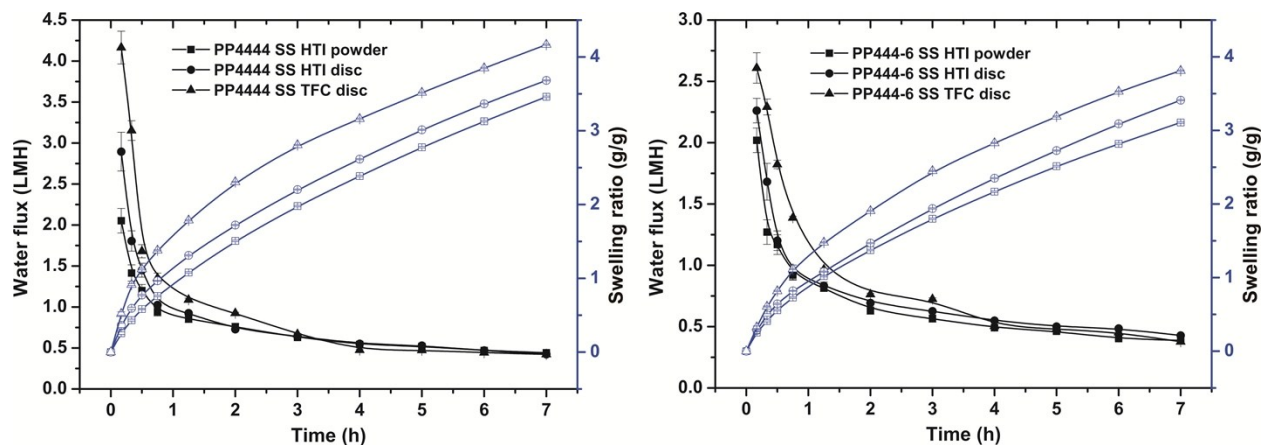

22

23 Fig S1. The influence of hydrogel interstitial volume and FO membrane on swelling performance of PP4444 SS and  
 24 PP444-6 SS.

25

26 **FESEM images of FO membranes**

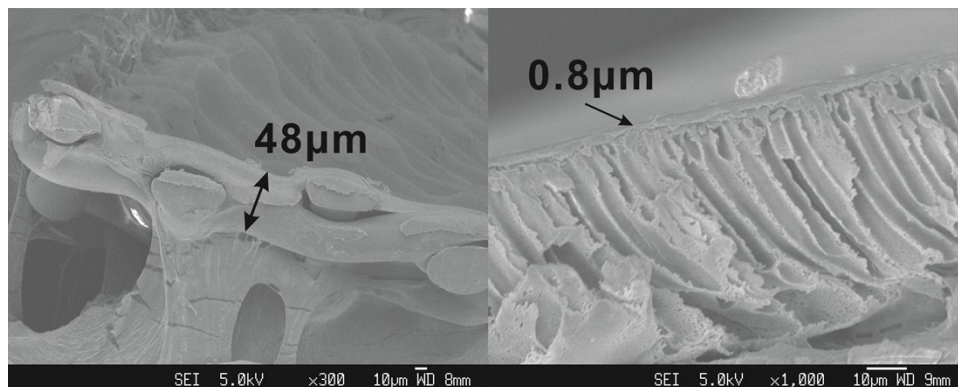

27

28 Fig S2. FESEM images of cellulose triacetate membrane from HTI (left) and thin film composite (TFC) membrane (right).  
 29 The thickness of selective layer of each membrane was indicated.

30

31

32

33

### 34 Liquid water fraction in hydrogel deswelling

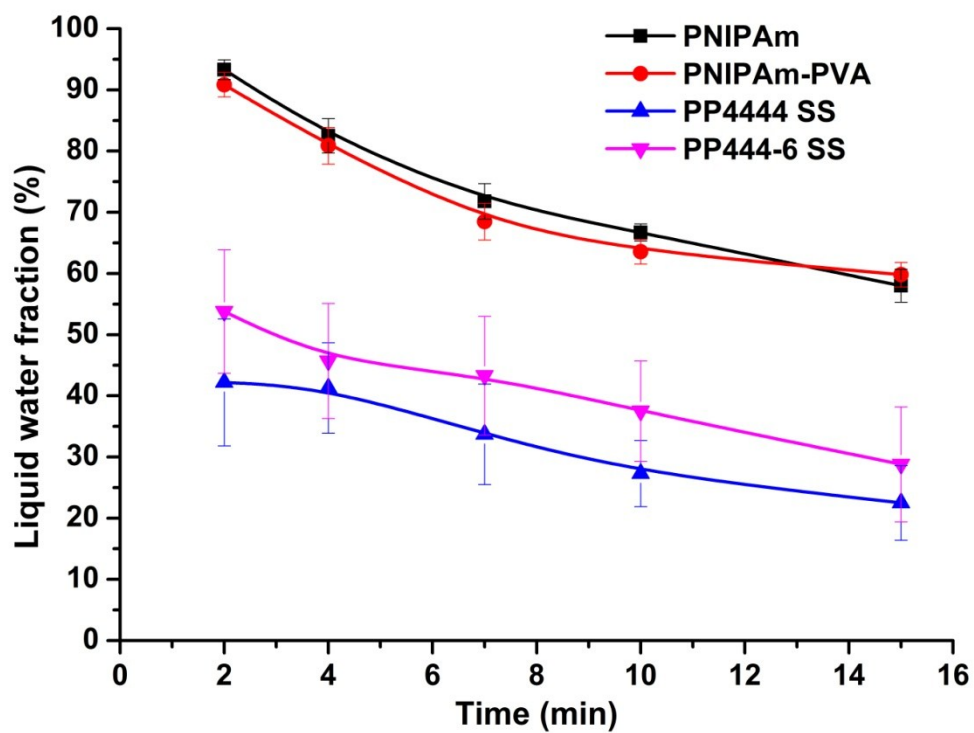

Fig. S3 Fraction of liquid water released in regeneration process.

35

36

37

38

39

40

41

## 42 Fitting of the correlation between swelling ratio and FO time

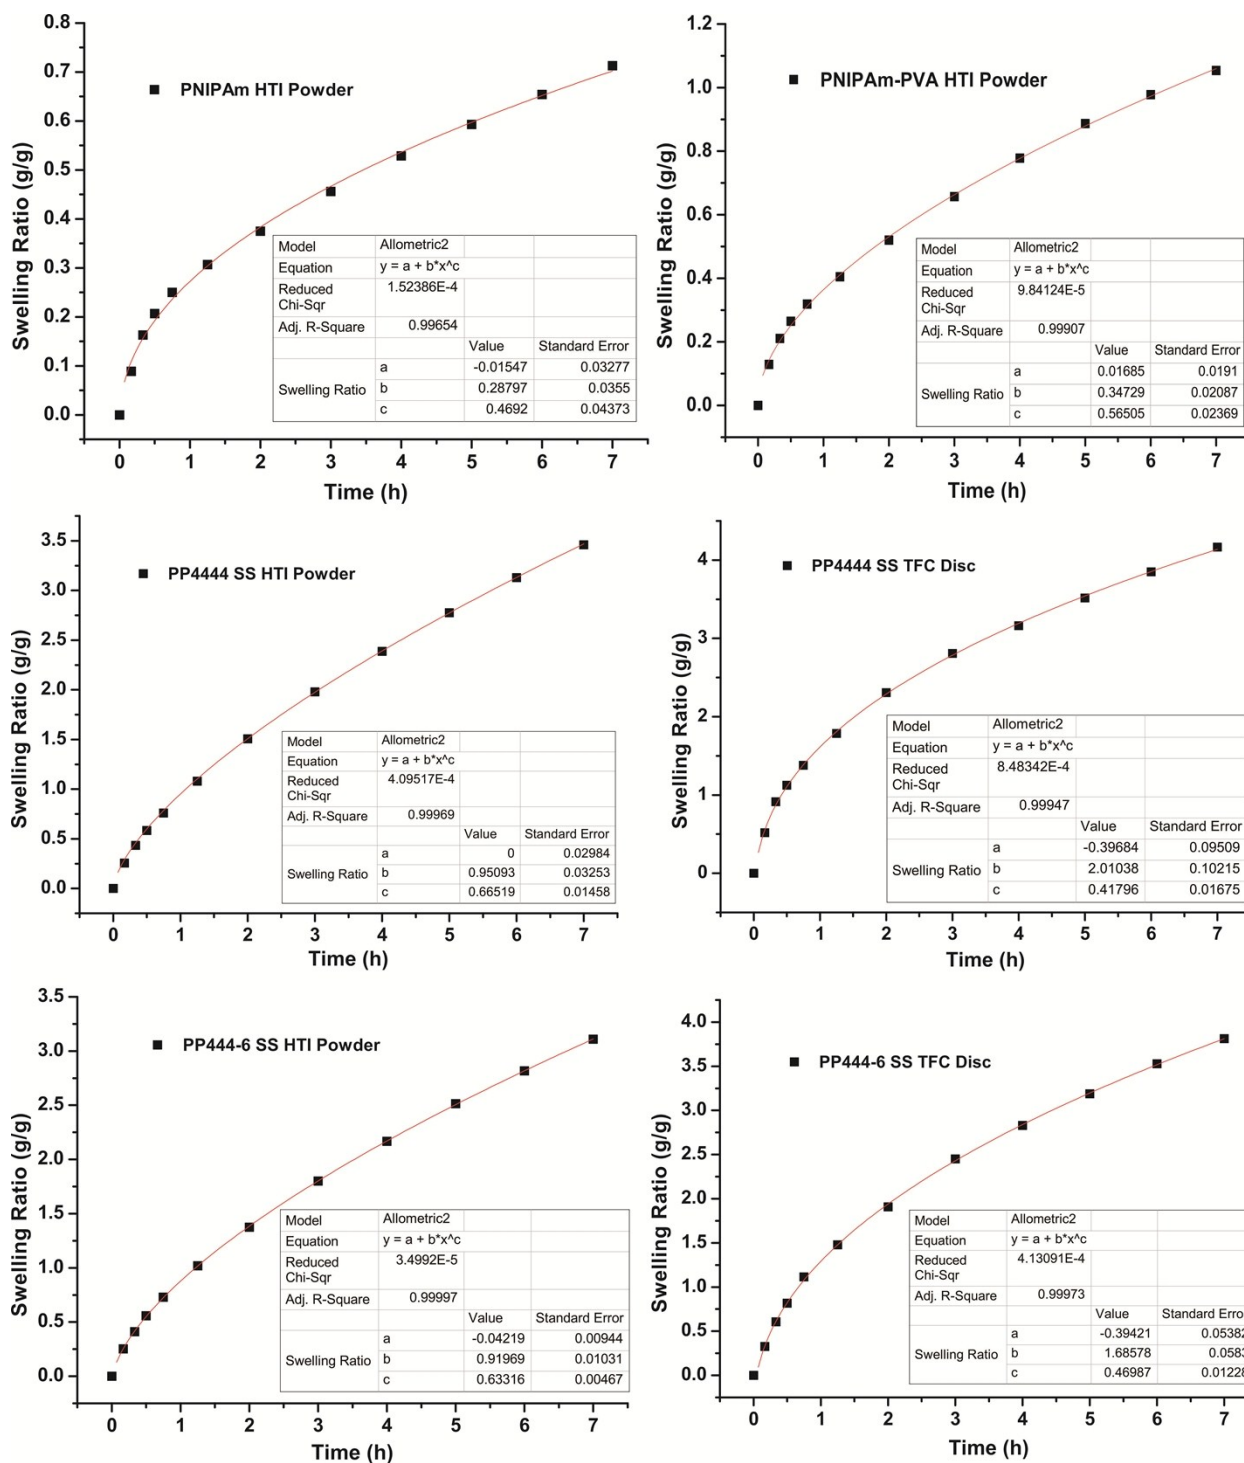

43

Fig S4. Swelling ratio versus FO time fitting for different hydrogel in powder form with HTI membrane and in disc form with TFC membrane.

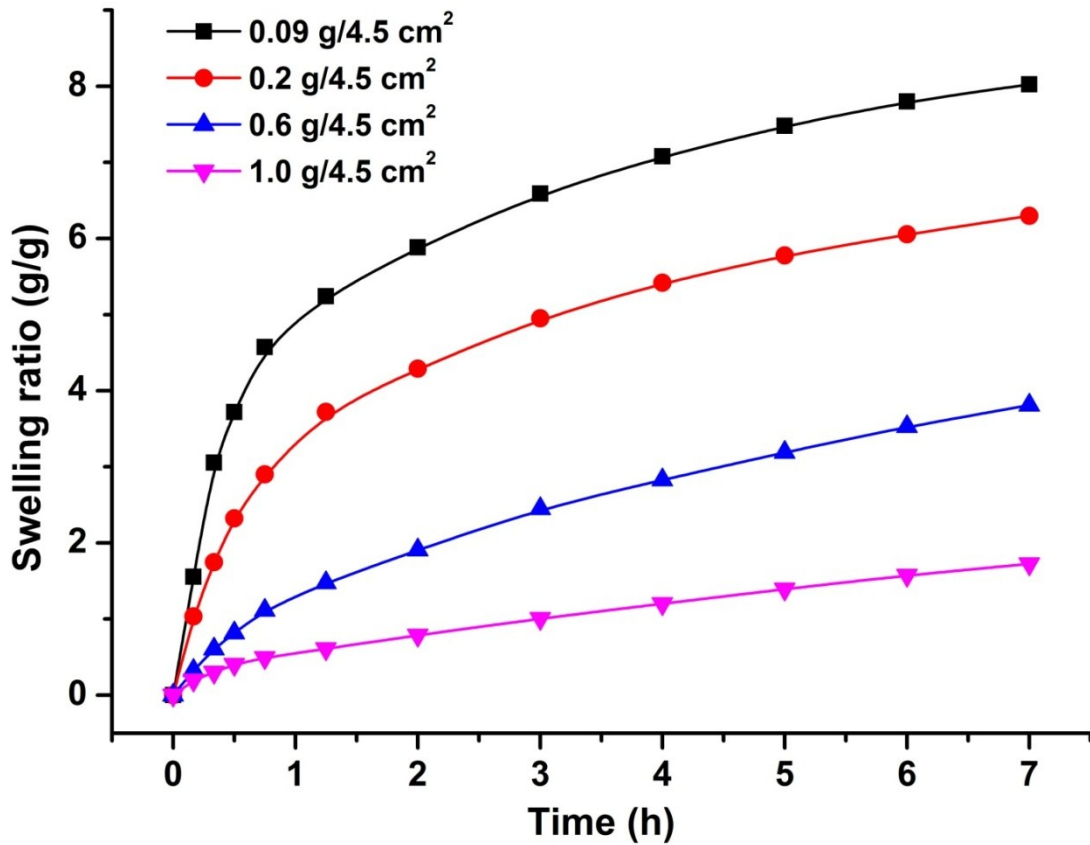

44

45 Fig S5. The influence of area density on the hydrogel FO performance. The hydrogel was PP444-6 SS in disc form. FO  
 46 membrane was TFC membrane.

47

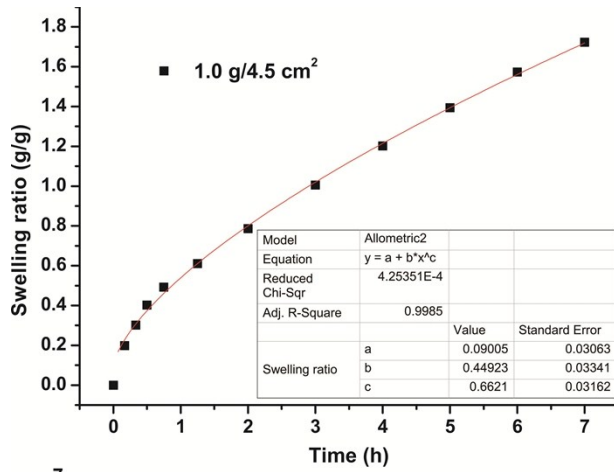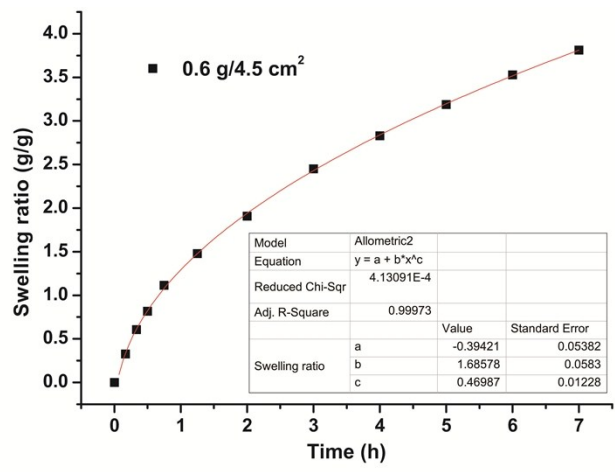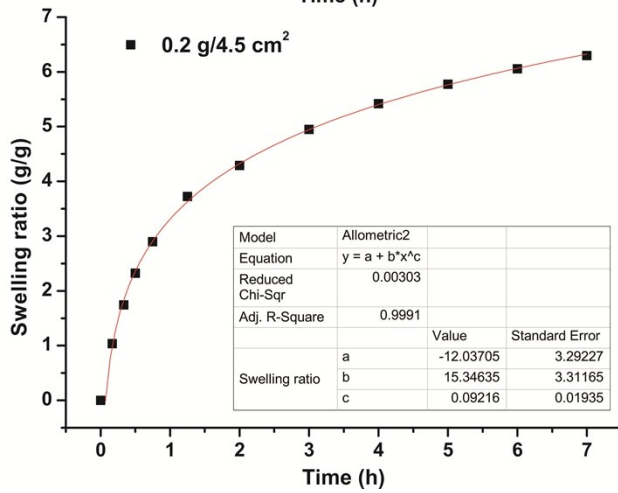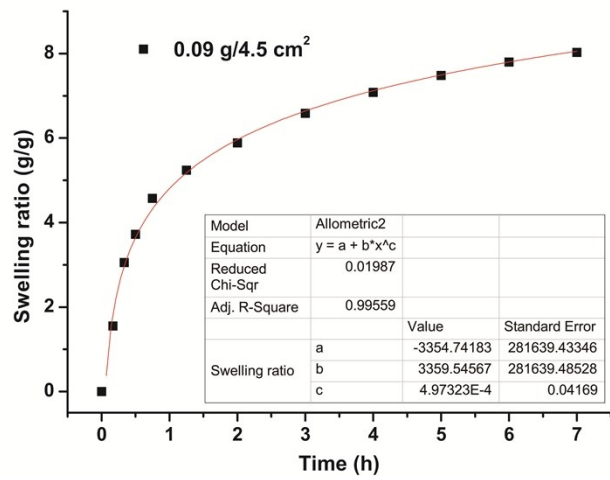

48

Fig S6. Swelling ratio versus FO time fitting for P444-6 SS with different area density. The hydrogel was in disc form using TFC membrane.
